# Supplementary material
Source: publisher figshare collection journal article supplement (https://sage.figshare.com/ndownloader/files/17615264)
Supplement: Supplementary file 1 [file 17615264]

## Consolidated criteria for reporting qualitative studies (COREQ): 32-item checklist

Developed from:

Tong A, Sainsbury P, Craig J. Consolidated criteria for reporting qualitative research (COREQ): a 32-item checklist for interviews and focus groups. *International Journal for Quality in Health Care*. 2007. Volume 19, Number 6: pp. 349 – 357

**YOU MUST PROVIDE A RESPONSE FOR ALL ITEMS. ENTER N/A IF NOT APPLICABLE**

| No. Item                                       | Guide questions/description                            | Reported on Page #                                                                                                                                                                                                                                                                 |
|------------------------------------------------|--------------------------------------------------------|------------------------------------------------------------------------------------------------------------------------------------------------------------------------------------------------------------------------------------------------------------------------------------|
| <b>Domain 1: Research team and reflexivity</b> |                                                        |                                                                                                                                                                                                                                                                                    |
| <i>Personal Characteristics</i>                |                                                        |                                                                                                                                                                                                                                                                                    |
| 1. Interviewer/facilitator                     | Which author/s conducted the interview or focus group? | Page 3: “All the interviews were conducted by L.M.L.L.P.”                                                                                                                                                                                                                          |
| 2. Credentials                                 | What were the researcher’s credentials? E.g. PhD, MD   | Page 3: “Six researchers (five women and one man) participated in this study, including a public oral health MSc student (L.M.L.L.P), a dental prothesist (A.A.S), an undergraduate dental student (J.G.C) and four researchers in public oral health (E.F.F, V.G.C, A.A.S R.C.F)” |
| 3. Occupation                                  | What was their occupation at the time of the study?    | Page 3: “Six researchers (five women and one man) participated in this study, including a public oral health MSc student (L.M.L.L.P), a dental prothesist (A.A.S), an undergraduate dental student (J.G.C) and four researchers in public oral health (E.F.F, V.G.C, A.A.S R.C.F)” |
| 4. Gender                                      | Was the researcher male or female?                     | Page 3: “Six researchers (five women and one man) participated in this study...”                                                                                                                                                                                                   |
| 5. Experience and training                     | What experience or training did the researcher have?   | Page 3: “Four of the participants (E.F.F, V.G.C, A.A.S, R.C.F) had previous experience in qualitative study designs...”                                                                                                                                                            |
| <i>Relationship with participants</i>          |                                                        |                                                                                                                                                                                                                                                                                    |

|                                             |                                                                                                                                                          |                                                                                                                                                                                                                                                                                   |
|---------------------------------------------|----------------------------------------------------------------------------------------------------------------------------------------------------------|-----------------------------------------------------------------------------------------------------------------------------------------------------------------------------------------------------------------------------------------------------------------------------------|
| 6. Relationship established                 | Was a relationship established prior to study commencement?                                                                                              | Page 3: "...and had no prior relation with the patients included."                                                                                                                                                                                                                |
| 7. Participant knowledge of the interviewer | What did the participants know about the researcher? e.g. personal goals, reasons for doing the research                                                 | Page 4: "The subjects were clarified as to the formation and institutional link of the researchers with the university and the confidentiality of their identities during the publication of the research results. The researchers also clarified all questions of the subjects." |
| 8. Interviewer characteristics              | What characteristics were reported about the interviewer/facilitator? e.g. Bias, assumptions, reasons and interests in the research topic                | Page 4: "Thanks for the comment. Please note that subtitles are after the reference list, as stated in the magazine's rules."                                                                                                                                                     |
| <b>Domain 2: study design</b>               |                                                                                                                                                          |                                                                                                                                                                                                                                                                                   |
| <i>Theoretical framework</i>                |                                                                                                                                                          |                                                                                                                                                                                                                                                                                   |
| 9. Methodological orientation and Theory    | What methodological orientation was stated to underpin the study? e.g. grounded theory, discourse analysis, ethnography, phenomenology, content analysis | Page 5: "...Subsequently, data were categorized using the MAXQDA 12 software and analyzed according to the content analysis proposed by Graneheim and Lundman, <sup>17</sup> where the units of meaning were identified and established through statements.."                     |
| <i>Participant selection</i>                |                                                                                                                                                          |                                                                                                                                                                                                                                                                                   |
| 10. Sampling                                | How were participants selected? e.g. purposive, convenience, consecutive, snowball                                                                       | Page 4: "A purposive sampling was used".                                                                                                                                                                                                                                          |
| 11. Method of approach                      | How were participants approached? e.g. face-to-face, telephone, mail, email                                                                              | Page 4: "The recruitment was initially conducted by phone, where the individuals were asked about the place they wanted to be interviewed and all chose their homes".                                                                                                             |
| 12. Sample size                             | How many participants were in the study?                                                                                                                 | Page 4: "This led to 11 participants being involved in the study."                                                                                                                                                                                                                |
| 13. Non-participation                       | How many people refused to participate or dropped out? Reasons?                                                                                          | Page 4: "Two selected subjects did not agree to participate in the study, arguing that they would not like to be interviewed."                                                                                                                                                    |
| <i>Setting</i>                              |                                                                                                                                                          |                                                                                                                                                                                                                                                                                   |
| 14. Setting of data collection              | Where was the data collected? e.g. home, clinic, workplace                                                                                               | Page 4: "...where the individuals were asked about the place they wanted to be interviewed and all chose their homes."                                                                                                                                                            |
| 15. Presence of non-participants            | Was anyone else present besides the participants and researchers?                                                                                        | N/A                                                                                                                                                                                                                                                                               |

|                            |                                                                                  |                                                                                                                                                                                                                                                                                                                                                                                                                                                               |
|----------------------------|----------------------------------------------------------------------------------|---------------------------------------------------------------------------------------------------------------------------------------------------------------------------------------------------------------------------------------------------------------------------------------------------------------------------------------------------------------------------------------------------------------------------------------------------------------|
| 16. Description of sample  | What are the important characteristics of the sample?e.g. demographic data, date | Page 4: “ These individuals were intentionally selected among participants of a seven-year follow-up study that evaluated user satisfaction and the quality of complete dentures provided by primary health care in Belo Horizonte, Brazil, <sup>14</sup> and who used at least one of the complete dentures (successful cases), considering the individual necessity.”                                                                                       |
| <i>Data collection</i>     |                                                                                  |                                                                                                                                                                                                                                                                                                                                                                                                                                                               |
| 17. Interview guide        | Were questions, prompts, guides provided by the authors? Was it pilot tested?    | Page 5: “Initially, a pilot study was conducted with three taped interviews with subjects selected from the same sample of the follow-up study. These interviews were transcribed and discussed among the team of researchers (interviewer, observer and four experts in qualitative research). There was a change in the interview guide and the interviewers’ approach to ask about the participants' feelings and perception, according to the study aim.” |
| 18. Repeat interviews      | Were repeat interviews carried out? If yes, how many?                            | N/A                                                                                                                                                                                                                                                                                                                                                                                                                                                           |
| 19. Audio/visual recording | Did the research use audio or visual recording to collect the data?              | Page 4: “A semi-structured interview, in Portuguese, lasting about 40 minutes, was conducted and audio taped with each subject using an interview guide.”                                                                                                                                                                                                                                                                                                     |
| 20. Field notes            | Were field notes made during and/or after the interview or focus group?          | N/A                                                                                                                                                                                                                                                                                                                                                                                                                                                           |
| 21. Duration               | What was the duration of the interviews or focus group?                          | Page 4: “A semi-structured interview, in Portuguese, lasting about 40 minutes...”                                                                                                                                                                                                                                                                                                                                                                             |
| 22. Data saturation        | Was data saturation discussed?                                                   | Page 5: “Data collection and analysis were conducted simultaneously and continued until new interviews did not provide any additional information and data already found were rich and deep for researchers (saturation strategy).”                                                                                                                                                                                                                           |

|                                        |                                                                                                                                    |                                                                                                                                                  |
|----------------------------------------|------------------------------------------------------------------------------------------------------------------------------------|--------------------------------------------------------------------------------------------------------------------------------------------------|
| 23. Transcripts returned               | Were transcripts returned to participants for comment and/or correction?                                                           | Page 5: “The participant validated the summary of the data presented by interviewer shortly after the end of the interview.”                     |
| <b>Domain 3: analysis and findings</b> |                                                                                                                                    |                                                                                                                                                  |
| <i>Data analysis</i>                   |                                                                                                                                    |                                                                                                                                                  |
| 24. Number of data coders              | How many data coders coded the data?                                                                                               | Figure 1                                                                                                                                         |
| 25. Description of the coding tree     | Did authors provide a description of the coding tree?                                                                              | N/A                                                                                                                                              |
| 26. Derivation of themes               | Were themes identified in advance or derived from the data?                                                                        | Page 5: “...three themes were pre-established for this research...”                                                                              |
| 27. Software                           | What software, if applicable, was used to manage the data?                                                                         | Page 5: “... using the MAXQDA 12 software...”                                                                                                    |
| 28. Participant checking               | Did participants provide feedback on the findings?                                                                                 | N/A                                                                                                                                              |
| <i>Reporting</i>                       |                                                                                                                                    |                                                                                                                                                  |
| 29. Quotations presented               | Were participant quotations presented to illustrate the themes/findings?<br>Was each quotation identified? e.g. participant number | Tables 1, 2, 3 and 4.<br>Each quotation was identified with participant number.                                                                  |
| 30. Data and findings consistent       | Was there consistency between the data presented and the findings?                                                                 | Page 6-12: Results and discussion section.                                                                                                       |
| 31. Clarity of major themes            | Were major themes clearly presented in the findings?                                                                               | Page 6: “For better elucidation, the statements were shown within each theme, highlighting their most relevant aspects (Tables 1, 2, 3, and 4).” |
| 32. Clarity of minor themes            | Is there a description of diverse cases or discussion of minor themes?                                                             | Page 6-12: Results and discussion section.                                                                                                       |

**Once you have completed this checklist, please save a copy and upload it as part of your submission. When requested to do so as part of the upload process, please select the file type: *Checklist*. You will NOT be able to proceed with submission unless the checklist has been uploaded. Please DO NOT include this checklist as part of the main manuscript document. It must be uploaded as a separate file.**
